# The American Journal of Psychiatry

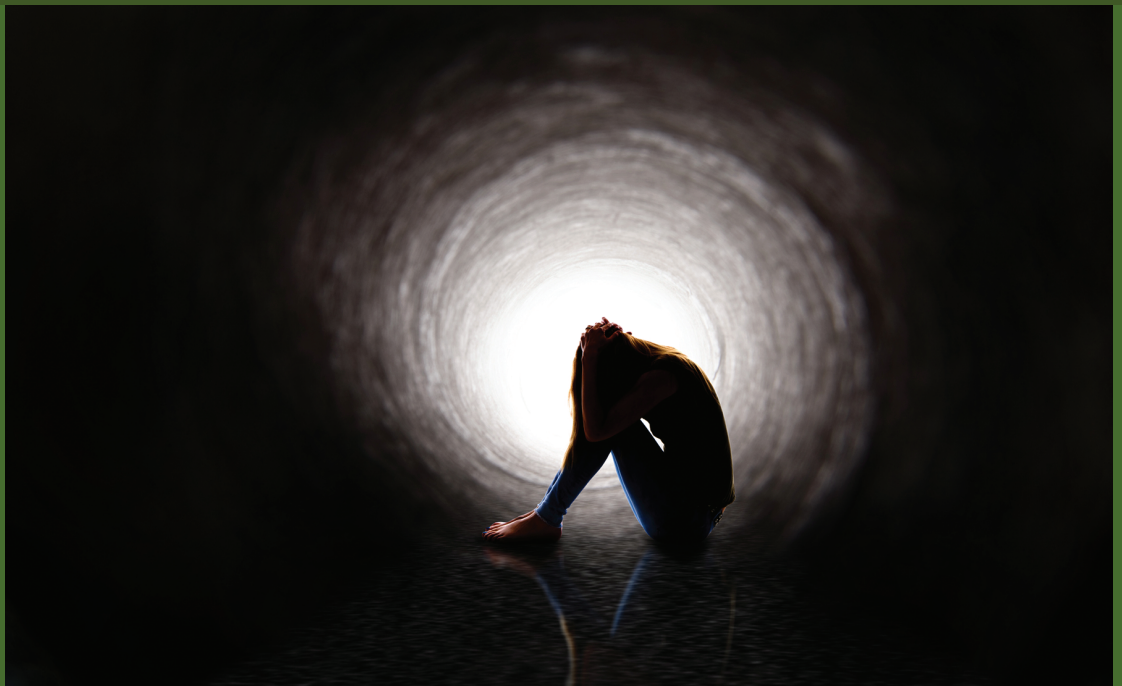

The State of Our Understanding of the Pathophysiology and Optimal Treatment of Depression: Glass Half Full or Half Empty?

Hormonal Treatments for Major Depressive Disorder: State of the Art

20-Year Trends in the Pharmacologic Treatment of Bipolar Disorder  
by Psychiatrists in Outpatient Care Settings

Stanford Accelerated Intelligent Neuromodulation Therapy  
for Treatment-Resistant Depression
