# The American Journal of Psychiatry

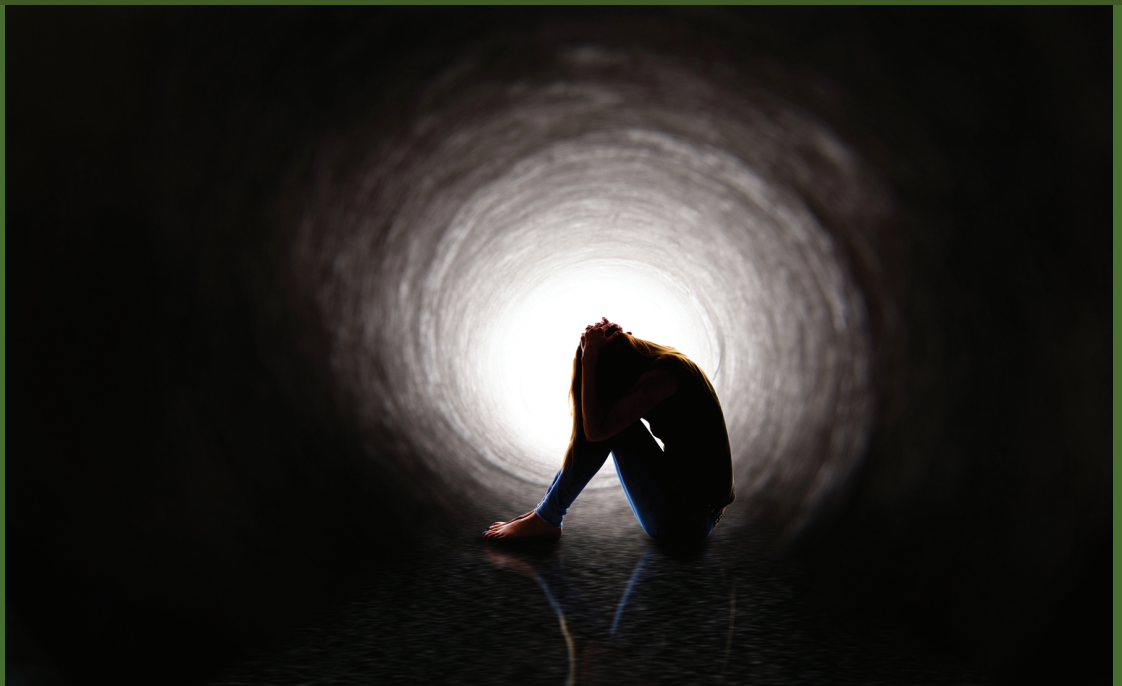

The State of Our Understanding of the Pathophysiology and Optimal Treatment of Depression: Glass Half Full or Half Empty?

Hormonal Treatments for Major Depressive Disorder: State of the Art

20-Year Trends in the Pharmacologic Treatment of Bipolar Disorder  
by Psychiatrists in Outpatient Care Settings

Stanford Accelerated Intelligent Neuromodulation Therapy  
for Treatment-Resistant Depression

# Answers

Serious mental illness (SMI) involves complex conditions. That means mental health clinicians often have complex questions.

Now there is a better way to save time and find evidence-based answers. Use SMI Adviser's FREE clinician-to-clinician consultations. Submit any questions about SMI and receive a personal response from one of our national experts. It takes just two minutes and you get a direct answer within one business day.

This is just one of many free resources from SMI Adviser.

**Better clinical support. Better resources. Better care for people who have SMI.**

**Join our #MissionForBetter at [SMIadviser.org](https://www.smiadviser.org)**

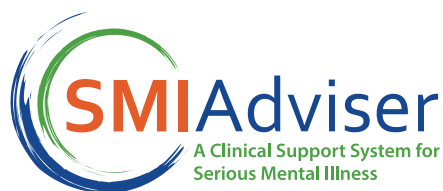

#### GRANT STATEMENT

Funding for this initiative was made possible (in part) by Grant No. 1H79SM080818-01 from SAMHSA. The views expressed in written conference materials or publications and by speakers and moderators do not necessarily reflect the official policies of the Department of Health and Human Services; nor does mention of trade names, commercial practices, or organizations imply endorsement by the U.S. Government.

© 2020 American Psychiatric Association. All rights reserved.

An APA and SAMHSA Initiative

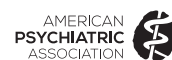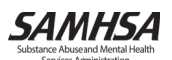

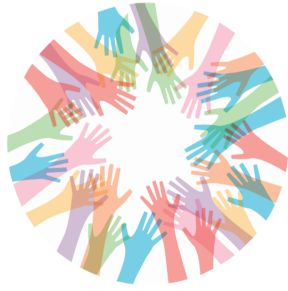

# REACH

Recognizing and Eliminating disparities in Addiction through Culturally informed Healthcare

Want to learn how to improve care for racial and ethnic minority patients with substance use disorder?

## ABOUT REACH

REACH is 1-year program for trainees interested in pursuing an Addiction Fellowship beginning July 2021, as well as medical students, residents, APRN/NP and PA trainees from racial/ethnic underrepresented minority (URM) backgrounds, all specialties.

Scholars endeavor to be change agents to improve the health and health care of racial/ethnic URM patients with substance use disorders (SUDs).

## APPLICATION TIMELINE

-  **May 1, 2020**  
Online application opens
-  **August 15, 2020**  
Application deadline, 5PM EST
-  **September – October 2020**  
Invited Fellows are interviewed
-  **November 2020**  
Notice of acceptance for all Scholars
-  **July 1, 2021**  
Entry of accepted Scholars into the program at participating universities

Funding provided for scholars to attend the 1-Week Intensive, 1 conference, and up to \$104,000 for Fellowship programs.

## CURRICULUM

- 1-Week Intensive course at Yale University; includes Advocacy, Racism and Health, Systems of Care, Structural Competency, Harm Reduction, Medical Co-morbidities, and more.
- Scholarly Project to improve health outcomes for racial/ethnic URM
- Professional Mentorship
- Monthly Webinars

## ELIGIBILITY

- In training (i.e. entering fellowship, in residency or school) as of July 1, 2021
- U.S. Citizen
- Racial/ethnic minority background (i.e. Black, African, African-American, Non-Caucasian Hispanic or Latinx, American Indian, Alaskan Native, Native Hawaiian, Pacific Islander)

## FOR MORE INFORMATION:

WEBSITE: <https://reachgrant.org>

EMAIL: [reach@aaap.org](mailto:reach@aaap.org)

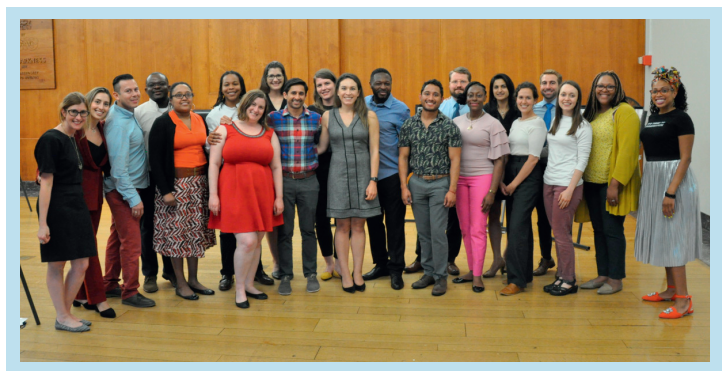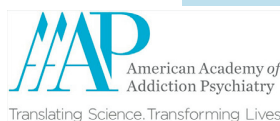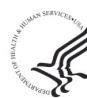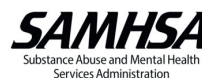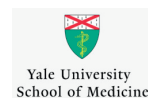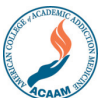

Funding for this initiative was made possible (in part) by grant no. 5H79T1081358-02 from SAMHSA. The views expressed in written conference materials or publications and by speakers and moderators do not necessarily reflect the official policies of the Department of Health and Human Services; nor does mention of trade names, commercial practices, organizations imply endorsement by the U.S. government



# THE AMERICAN PSYCHIATRIC ASSOCIATION

800 Maine Avenue, S.W., Suite 900, Washington, D.C. 20024

(888) 357-7924 (toll-free inside the U.S. and Canada)

web site: [www.psychiatry.org](http://www.psychiatry.org) • e-mail: [apa@psych.org](mailto:apa@psych.org)

## Chairpersons of Councils, Committees, and Task Forces

### Standing Committees

|                             |                                   |
|-----------------------------|-----------------------------------|
| <b>Bylaws</b>               | Kimberly D. Nordstrom, M.D., J.D. |
| <b>Elections</b>            | Justin W. Schoen, M.D.            |
| <b>Ethics</b>               | Rebecca W. Brendel, M.D., J.D.    |
| <b>Finance and Budget</b>   | Ann T. Sullivan, M.D.             |
| <i>Audit</i>                | Ayana Jordan, M.D., Ph.D.         |
| <i>Investment Oversight</i> | Steven S. Sharfstein, M.D.        |
| <b>Joint Reference</b>      | Vivian Pender, M.D.               |
| <b>Membership</b>           | Eric R. Williams, M.D.            |
| <b>Nominating</b>           | Bruce J. Schwartz, M.D.           |
| <b>Tellers</b>              | John A. Talbott, M.D.             |

### Non-Standing Committee

|                             |                               |
|-----------------------------|-------------------------------|
| <b>Conflict of Interest</b> | Sandra M. DeJong, M.D., M.Sc. |
|-----------------------------|-------------------------------|

### Councils

#### Council on Addiction Psychiatry

Jill Williams, M.D.

#### Council on Advocacy and Government Relations

Katherine G. Kennedy, M.D.

*Advocacy and Litigation Funding*

Bhasker J. Dave, M.D.

#### Council on Children, Adolescents, and Their Families

Gabrielle Shapiro, M.D.

*Women's Mental Health*

Ludmila B. De Faria, M.D.

#### Council on Communications

Isabel K. Norian, M.D.

#### Council on Consultation-Liaison Psychiatry

Sejal B. Shah, M.D.

#### Council on Geriatric Psychiatry

Robert P. Roca, M.D.

#### Council on Healthcare Systems and Financing

Robert L. Trestman, M.D., Ph.D.

*Integrated Care*

Henry Chung, M.D.

*RBRVS, Codes and Reimbursement*

Gregory G. Harris, M.D.

*Reimbursement for Psychiatric Care*

Laurence H. Miller, M.D.

*Telepsychiatry*

James H. Shore, M.D.

#### Council on International Psychiatry

David C. Henderson, M.D.

*Chester Pierce Human Rights Award Committee*

[Pending]

#### Council on Medical Education and Lifelong Learning

Eindra Khin Khin, M.D.

*Innovation*

Nina Vasani, M.D.

*Scientific Program*

Jacqueline M. Feldman, M.D.

*Scientific Program-IPS (Oct. to Oct. tenure)*

[Pending]

*Vestermark Award Committee*

Joseph A. Cheong, M.D.

*Well-being and Burnout*

Batool Kazim, M.D.

#### Council on Minority Mental Health and Health Disparities

Eric Yarbrough, M.D.

#### Council on Psychiatry and Law

Debra A. Pinals, M.D.

*Judicial Action*

Reena Kapoor, M.D.

#### Council on Quality Care

Grayson S. Norquist, M.D.

*Mental Health Information Technology*

John Torous, M.D.

*Quality and Performance Measurement*

Carol Alter, M.D.

*Practice Guidelines*

Daniel J. Anzia, M.D.

#### Council on Research

Jonathan E. Alpert, M.D., Ph.D.

*Psychiatric Dimensions of Disasters*

Joshua C. Morganstein, M.D.



# See and Hear What the Field Is Discussing!

*Psychiatric Services* features research related to the delivery of mental health services, especially for people with serious mental illness in community-based treatment programs. Provision of high-quality care involves collaboration among a variety of professionals. Clinicians, administrators, and policy makers look to *Psychiatric Services* for research on how to deliver evidence-based treatments, to take an integrated “whole-health” approach to care, and to better engage individuals in their care. Mental health’s current focus on patient-centered, recovery-oriented care and on dissemination of evidence-based practices is transforming service delivery systems at all levels. Research published in *Psychiatric Services* contributes to this transformation.

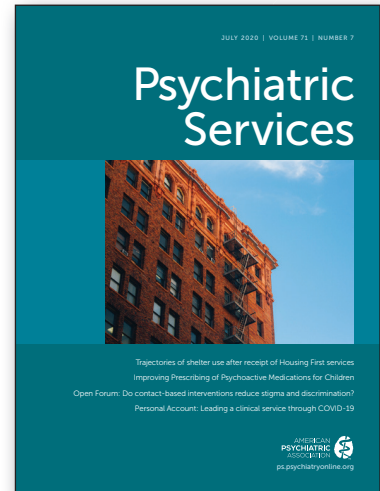

## Our Most Talked About Articles so far in 2020:

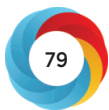

### National Study of Telepsychiatry Use in U.S. Emergency Departments

Article in in *Psychiatric Services*, June 2020

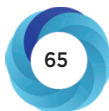

### The Journey to Use Medication Optimally to Support Recovery

Personal Account in *Psychiatric Services*, April 2020

## Dive Deeper With “From Pages to Practice” Podcast

Editor Lisa Dixon, M.D., M.P.H., and Podcast Editor and co-host Josh Berezin, M.D., M.S., discuss the latest mental health services research published in *Psychiatric Services* and why it is relevant. Topics include community-based treatment programs, collaborative care, evidence-based treatment and service delivery, criminal and social justice, policy analysis, and more.

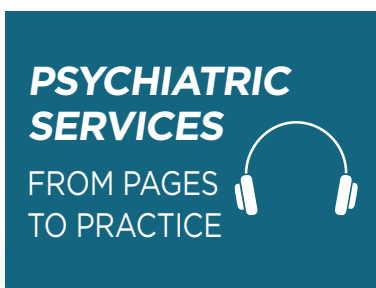

### July 2020: State Policies Regarding Medical Marijuana

Erik Messamore, M.D., Ph.D., joins Dr. Dixon and Dr. Berezin to discuss suggestions for informing the public more effectively about the potential benefits and risks of marijuana in state medical marijuana programs.

### May 2020: Mental Health Policy in the Era of COVID-19

Matthew Goldman, M.D., M.S., joins Dr. Dixon and Dr. Berezin to discuss the significant changes in mental health policy prompted by the COVID-19 crisis.

# Go Online

Visit [ajp.psychiatryonline.org](http://ajp.psychiatryonline.org) for these features!

## **AJP in Advance** *Discover the latest research advances before they appear in print*

### **Neural Correlates of the Dual-Pathway Model for ADHD in Adolescents**

The dual pathway model has been proposed to explain the heterogeneity of ADHD by independent psychological processes based on distinct brain circuits, but the neuroimaging evidences remain inconclusive. The authors combined a large-scale longitudinal neuroimaging cohort of adolescents with a clinical neuroimaging cohort of ADHD patients. They identified and validated a common neuroanatomical correlate of both cognitive and motivational pathways, demonstrating an interaction effect between these two pathways for the development of ADHD.

### **Callous-Unemotional Traits and Risk of Gun Carrying and Use During Crime**

Callous-unemotional traits measured after adolescents' first arrest predicted gun carrying and gun use in a violent crime across 5 years, after controlling for other risk factors for gun use. Peer gun carrying/ownership was related to adolescent gun carrying only at low levels of callous-unemotional traits.

## **AJP CME** *Earn CME credit: 3 courses per issue*

This month's courses appear on pages 787–790.

## **AJP Multimedia** *Access Audio for highlights of each issue*

In the AJP Audio podcast this month, Executive Editor Michael Roy speaks with Jennifer Dwyer, M.D., Ph.D., and Awais Aftab, M.D., about the physiology of three major endocrine systems and about the evidence for hormone-based interventions in the treatment of major depressive disorder (p. 686).

In this month's video, Deputy Editor Daniel S. Pine, M.D., discusses the article by Cole et al. "Stanford Accelerated Intelligent Neuromodulation Therapy for Treatment-Resistant Depression" (p. 716) and "Intergenerational Effects of Maternal Holocaust Exposure on *FKBP5* Methylation" by Bierer et al. (p. 744)

## **History of Psychiatry** *Revisit the field's rich history through the AJP Archive*

### **25 Years Ago This Month: Clients, Consumers, Providers, and Products: Where Will It All End?**

Amid an earlier decade's look at addressing the country's health care system, the Journal's Editor-in-Chief Nancy Andreasen, M.D., Ph.D., issued a call that still resonates: "It is our responsibility to argue on their behalf for the best care possible, within reasonable constraints of cost, and to try to ensure that those who suffer most profoundly receive the most intensive care. The economists and politicians can defend their own agenda, but we as physicians need to set agenda of our own."

Note  
Our New  
Twitter  
Handle!

@APAPubJournals

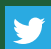

Psychiatry Online

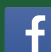

AMERICAN  
PSYCHIATRIC  
ASSOCIATION  
PUBLISHING

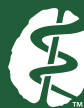

[www.appi.org](http://www.appi.org)  
1-800-368-5777  
[appi@psych.org](mailto:appi@psych.org)
